# Supplementary material
Source: Research Square preprint supplement (doi:10.21203/rs.3.rs-7160638/v1)
Supplement: Supplementary file 1 [file 20c4991f3500b142c74e46fc.xlsx]

## Sheet: Table-S1
Animal Metadata												Viral Metadata												Bacterial Metadata												SCFA Measurements
Order	Sample	Animal Code	Animal ID	Time Point	Date	Time	Hours since start	Previous ID ?	Type of sample	Diet	pH	Viral Sample ID	Alternative ID	Original filename	Fwd-Barcode	Rev-Barcode	Fwd-BC	Rev-BC	viral DNA concentration	Pielous evenness	Shannon	Richness	RawReads_viral	SampleID	Alternative ID	Fwd-Barcode	Rev-Barcode	Fwd-BC	Rev-BC	Bact-DNA concentration	RawReads	Clean Reads	Pielous evenness	Shannon	Richness	SampleID	Acetic acid (mmol/L)	Propionic acid (mmol/L)	Butiric acid (mmol/L)	Isovaleric acid (mmol/L)	Valeric acid (mmol/L)	Total_VFA (mmol/L)
1	A_000	A	9730	T1	2022-05-31	14:30:00	0	A0	Ruminocentesis	grass	6.16	VAt0	1V	N717_S526_TTCTTCTA_CCGGTACG_S2_	N717	S526	TTCTTCTA	CCGGTACG	7.14	0.8437	8.9093	38511	11247933	BAt0	2B	PE1-13	CGGCATTA	PE2-02	CCTTGGAAAT	34.6	24068	19691	0.8336	4.9907	393	5	172.3	73.5	44.8	7.3	8.7	306.6
2	A_017	A	9730	T2	2022-06-01	09:30:00	17	A17	Ruminocentesis	grass	7.2	VAt1	3V	N819_S526_AGGACCGC_CCGGTACG_S4_	N819	S526	AGGACCGC	CCGGTACG	18.6	0.8995	9.7395	50355	11542497	BAt1	9B	PE1-13	CGGCATTA	PE2-09	AGAGGAGAAT	35.5	30512	24521	0.8614	5.5667	626	1	114.6	55.9	25.1	8.5	8.5	212.6
3	A_028	A	9730	T5	2022-06-01	18:20:00	28	A28	Ruminocentesis	corn	6.46	VAt2	6V	N822_S526_CCACGGCC_CCGGTACG_S7_	N822	S526	CCACGGCC	CCGGTACG	20	0.9028	9.7894	51118	12518400	BAt2	1B	PE1-13	CGGCATTA	PE2-01	AAGCTAGGAT	60						15	142.2	68.4	41.5	7.3	8.5	267.9
4	A_031	A	9730	T7	2022-06-01	21:00:00	31	A31	Ruminocentesis	corn	6.37	VAt3	2V	N818_S526_TACCTGAC_CCGGTACG_S3_	N818	S526	TACCTGAC	CCGGTACG	11.6	0.8933	9.5959	46264	11774019	BAt3	7B	PE1-13	CGGCATTA	PE2-07	TTGCAACGAT	40.7	28632	23840	0.8412	5.2262	492	10	132.2	70.1	33.9	5.6	8.1	249.9
5	A_043	A	9730	T8	2022-06-02	09:30:00	43	A43	Ruminocentesis	corn	6.79	VAt4	7V	N823_S526_ACATGTAA_CCGGTACG_S8_	N823	S526	ACATGTAA	CCGGTACG	10.4	0.8712	9.4113	49150	12444763	BAt4	8B	PE1-13	CGGCATTA	PE2-08	GACTTCAGAT	39.3	27176	22315	0.8676	5.4425	971	26	151.6	97.1	30.8	< 5.0	8.2	287.7
6	A_051	A	9730	T11	2022-06-02	17:00:00	51	A51	Ruminocentesis	corn	6.14	VAt5	8V	N824_S526_TGTTAACT_CCGGTACG_S9_	N824	S526	TGTTAACT	CCGGTACG	26.4	0.771	8.2641	45188	12594184	BAt5	6B	PE1-13	CGGCATTA	PE2-06	TAGCCGTAAT	>60	73460	61048	0.8532	5.9549	524	30	150.5	88.8	37	5.8	8.6	290.7
7	A_067	A	9730	T12	2022-06-03	09:00:00	67	A67	Ruminocentesis	corn	6.8	VAt6	9V	N717_S527_TTCTTCTA_CCGTCATC_S10_	N717	S527	TTCTTCTA	CCGTCATC	30	0.8554	9.2222	48087	12952971	BAt6	3B	PE1-13	CGGCATTA	PE2-03	AAGCGGATAT	8.17	85814	73449	0.8465	5.9702	1023	24	183.1	106.4	40.7	5.8	9.2	345.2
8	A_091	A	9730	T14	2022-06-05	10:30:00	91	A91	Ruminocentesis	grass	7.44	VAt7	5V	N821_S526_CACGAGTT_CCGGTACG_S6_	N821	S526	CACGAGTT	CCGGTACG	9.34	0.8668	9.3112	46284	11904235	BAt7	4B	PE1-13	CGGCATTA	PE2-04	TCACACAGAT	29.7	32676	26747	0.8889	5.9727	807	29	57.1	22.7	17	< 5.0	7.9	104.7
9	A_336	A	9730	T15	2022-06-19	11:20:00	336	A336	Nasogastric probe	grass	7.45	VAt8	10V	N818_S527_TACCTGAC_CCGTCATC_S11_	N818	S527	TACCTGAC	CCGTCATC	12.6	0.8622	9.2296	44526	12922036	BAT8	5B	PE1-13	CGGCATTA	PE2-05	ACAGACAGAT	>60	42865	37691	0.8286	5.4033	657	9	95.1	37.7	26.1	5	8	171.9
10	B_000	B	11002	T1	2022-05-31	14:30:00	0	B0	Ruminocentesis	grass	5.7	VBt0	12V	N820_S527_GTCCGATT_CCGTCATC_S13_	N820	S527	GTCCGATT	CCGTCATC	28.3	0.8742	9.4374	48753	13185783	BBt0	12B	PE1-15	CGTTGCTT	PE2-07	TTGCAACGAT	29.9	34346	29471	0.8448	5.2932	526	13	195.2	72.4	42.8	5.7	8.3	324.4
11	B_017	B	11002	T2	2022-06-01	09:30:00	17	B17	Ruminocentesis	grass	6.58	VBt1	17V	N717_S528_TTCTTCTA_CGTCTATA_S18_	N717	S528	TTCTTCTA	CGTCTATA	22.2	0.8975	9.6896	48817	12662052	BBt1	18B	PE1-4	CGCGATTA	PE2-04	TCACACAGAT	33.7	51915	43368	0.8442	5.7265	883	17	145.4	65.8	30.3	11.1	8.7	261.3
12	B_028	B	11002	T5	2022-06-01	18:20:00	28	B28	Ruminocentesis	corn	5.64	VBt2	18V	N818_S528_TACCTGAC_CGTCTATA_S19_	N818	S528	TACCTGAC	CGTCTATA	12.7	0.8925	9.6486	49545	12790651	BBt2	13B	PE1-13	CGGCATTA	PE2-13	GGTTATGCAT	57	18414	15559	0.8447	4.9583	354	12	155.8	90.2	40.9	5.8	8.8	301.5
13	B_031	B	11002	T7	2022-06-01	21:00:00	31	B31	Ruminocentesis	corn	5.59	VBt3	13V	N821_S527_CACGAGTT_CCGTCATC_S14_	N821	S527	CACGAGTT	CCGTCATC	31.7	0.8547	9.2188	48301	13873014	BBt3	15B	PE1-14	ACCAGTTG	PE2-01	AAGCTAGGAT	54						28	147.6	90.7	33.1	5	8.2	284.6
14	B_043	B	11002	T8	2022-06-02	09:30:00	43	B43	Ruminocentesis	corn	6.04	VBt4	14V	N822_S527_CCACGGCC_CCGTCATC_S15_	N822	S527	CCACGGCC	CCGTCATC	15.6	0.8583	9.2609	48511	13054772	BBt4	17B	PE1-4	CGCGATTA	PE2-03	CCTTGGAAAT	>60	30011	25850	0.8361	5.1445	470	6	154.9	92	31.6	< 5.0	8.3	286.8
15	B_051	B	11002	T11	2022-06-02	17:00:00	51	B51	Ruminocentesis	corn	5.34	VBt5	11V	N819_S527_AGGACCGC_CCGTCATC_S12_	N819	S527	AGGACCGC	CCGTCATC	20	0.7824	8.3717	44321	12155902	BBt5	16B	PE1-4	CGCGATTA	PE2-02	CCTTGGAAAT	53	25516	21210	0.8393	5.024	398	25	144.4	89.5	28.7	< 5.0	8.2	270.8
16	B_067	B	11002	T12	2022-06-03	09:00:00	67	B67	Ruminocentesis	corn	6.59	VBt6	16V	N824_S527_TGTTAACT_CCGTCATC_S17_	N824	S527	TGTTAACT	CCGTCATC	20	0.8516	9.0317	40315	12368472	BBT6	14B	PE1-13	CGGCATTA	PE2-14	CTACAGGTAT	>60	12521	10884	0.8583	4.887	297	14	182	100.8	40.1	< 5.0	8.4	331.3
17	B_091	B	11002	T14	2022-06-05	10:30:00	91	B91	Ruminocentesis	grass	6.36	VBT7												BBt7	10B	PE1-13	CGGCATTA	PE2-10	GTCTTGAGAT	43.7	34889	30260	0.8094	5.1421	574	23	167.5	79	38.8	5.6	8.3	299.2
18	B_336	B	11002	T15	2022-06-19	11:20:00	336	B336	Nasogastric probe	grass	7.16	VBt8	19V	N819_S528_AGGACCGC_CGTCTATA_S20_	N819	S528	AGGACCGC	CGTCTATA	32.2	0.9028	8.9948	51188	11466889	BBT8	11B	PE1-13	CGGCATTA	PE2-11	AGCTAGGAAT	29	49970	40809	0.8484	5.6799	808	11	65.2	27.5	19.3	< 5.0	7.9	119.9
19	C_000	C	5732	T1	2022-05-31	14:30:00	0	C0	Ruminocentesis	grass	6.5	VCt0	22V	N822_S528_CCACGGCC_CGTCTATA_S23_	N822	S528	CCACGGCC	CGTCTATA	11.6	0.8729	9.4513	50328	11682927	BCt0	24B	PE1-4	CGCGATTA	PE2-10	GTCTTGAGAT	27	34489	29946	0.8585	5.6614	731	20	166.6	65	38.6	5.6	8.3	284.1
20	C_017	C	5732	T2	2022-06-01	09:30:00	17	C17	Ruminocentesis	grass	6.97	VCt1	24V	N824_S528_TGTTAACT_CGTCTATA_S25_	N824	S528	TGTTAACT	CGTCTATA	4.11	0.9041	9.7644	49026	12409019	BCt1	23B	PE1-4	CGCGATTA	PE2-09	AGAGGAGAAT	57	26437	21119	0.8828	5.6593	608	8	143.7	65.1	31.1	12.5	9.1	261.5
21	C_028	C	5732	T5	2022-06-01	18:20:00	28	C28	Ruminocentesis	corn	5.6	VCt2	25V	N717_S529_TTCTTCTA_TCAATGAC_S26_	N717	S529	TTCTTCTA	TCAATGAC	10.2	0.8975	9.7254	50786	12706987	BCt2	27B	PE1-4	CGCGATTA	PE2-14	CTACAGGTAT	31.3	37600	26495				27	147.3	75.4	33.3	6.2	8.5	270.4
22	C_030	C	5732	T6	2022-06-01	20:30:00	30	C31	Ruminocentesis	corn	5.55	VCt3	23V	N823_S528_ACATGTAA_CGTCTATA_S24_	N823	S528	ACATGTAA	CGTCTATA	14.9	0.8993	9.7635	51829	12879916	BCt3	26B	PE1-4	CGCGATTA	PE2-13	GGTTATGCAT	48	45291	37626	0.8105	5.2038	614	2	100.5	53.7	22.7	5.6	8.2	190.7
23	C_043	C	5732	T8	2022-06-02	09:30:00	43	C43	Ruminocentesis	corn	5.78	VCt4	26V	N818_S529_TACCTGAC_TCAATGAC_S27_	N818	S529	TACCTGAC	TCAATGAC	15.6	0.8425	9.0862	48258	12157531	BCt5	19B	PE1-4	CGCGATTA	PE2-05	ACAGACAGAT	42.8	24633	21094	0.8349	5.4722	702	31	209.8	99.6	41.4	5.7	8.6	365.1
24	C_051	C	5732	T11	2022-06-02	17:00:00	51	C51	Ruminocentesis	corn	5.57	VCt5	27V	N819_S529_AGGACCGC_TCAATGAC_S28_	N819	S529	AGGACCGC	TCAATGAC	24.9	0.8159	8.7611	46072	12154281	BCt4	20B	PE1-4	CGCGATTA	PE2-06	TAGCCGTAAT	51	55633	46919	0.8718	5.3549	465	7	172.4	101	34.9	< 5.0	8.5	316.8
25	C_067	C	5732	T12	2022-06-03	09:00:00	67	C67	Ruminocentesis	corn	6.37	VCt6	21V	N821_S528_CACGAGTT_CGTCTATA_S22_	N821	S528	CACGAGTT	CGTCTATA	12.7	0.862	9.3396	50709	12424583	BCt6	21B	PE1-4	CGCGATTA	PE2-07	TTGCAACGAT	>60	26798	22971	0.8688	5.4856	552	4	132.4	71.9	29.9	5.5	8.2	247.9
26	C_091	C	5732	T14	2022-06-05	10:30:00	91	C91	Ruminocentesis	grass	6.1	VCt7	20V	N820_S528_GTCCGATT_CGTCTATA_S21_	N820	S528	GTCCGATT	CGTCTATA	5	0.8419	9.016	44752	13829272	BCt7	25B	PE1-4	CGCGATTA	PE2-11	AGCTAGGAAT	46	28469	23249	0.8531	5.4896	623	3	181.5	73.3	40.9	5.7	8.2	309.6
